1 Automated data-intensive forecasting of  
2 plant phenology throughout the United  
3 States

4 *Shawn D. Taylor*<sup>1</sup> (corresponding author), *shawntaylor@weecology.org*

5 *Ethan P. White*<sup>2</sup>, *ethanwhite@ufl.edu*

6 <sup>1</sup> School of Natural Resources and Environment, University of Florida Gainesville, FL, United  
7 States

8 <sup>2</sup> Department of Wildlife Ecology and Conservation, University of Florida, Gainesville, FL,  
9 United States

10 Running Head: Phenology Forecasting Methods

## 11 **Abstract**

12 Phenology - the timing of cyclical and seasonal natural phenomena such as flowering  
13 and leaf out - is an integral part of ecological systems with impacts on human activities  
14 like environmental management, tourism, and agriculture. As a result, there are  
15 numerous potential applications for actionable predictions of when phenological events  
16 will occur. However, despite the availability of phenological data with large spatial,  
17 temporal, and taxonomic extents, and numerous phenology models, there has been no  
18 automated species-level forecasts of plant phenology. This is due in part to the  
19 challenges of building a system that integrates large volumes of climate observations  
20 and forecasts, uses that data to fit models and make predictions for large numbers of  
21 species, and consistently disseminates the results of these forecasts in interpretable  
22 ways. Here we describe a new near-term phenology forecasting system that makes  
23 predictions for the timing of budburst, flowers, ripe fruit, and fall colors for 78 species  
24 across the United States up to 6 months in advance and is updated every four days. We  
25 use the lessons learned in developing this system to provide guidance developing  
26 large-scale near-term ecological forecast systems more generally, to help advance the  
27 use of automated forecasting in ecology.

28 **Keywords:** climate, budburst, flowering, phenophase, ecology, decision making

## 29 **Introduction**

30 Plant phenology - the timing of cyclical and seasonal natural phenomena such as  
31 flowering and leaf out - influences many aspects of ecological systems (Chuine and  
32 Régnière 2017) from small scale community interactions (Ogilvie et al. 2017) to global  
33 scale climate feedbacks (Richardson et al. 2012). Because of the central importance of  
34 phenology, advanced forecasts for when phenological events will occur have numerous  
35 potential applications including: 1) research on the cascading effects of changing plant  
36 phenology on other organisms; 2) tourism planning related to flower blooms and  
37 autumn colors; 3) planning for sampling and application of management interventions  
38 by researchers and managers; and 4) agricultural decisions on timing for planting,  
39 harvesting, and application of pest prevention techniques. However, due to the  
40 challenges of automatically integrating, predicting, and disseminating large volumes of  
41 data, there are limited examples of applied phenology forecast systems.

42 Numerous phenology models have been developed to characterize the timing of major  
43 plant events and understand their drivers (Chuine et al. 2013). These models are based  
44 on the idea that plant phenology is primarily driven by weather, with seasonal  
45 temperatures being the primary driver at temperate latitudes (Basler 2016, Chuine and  
46 Régnière 2017). Because phenology is driven primarily by weather, it is possible to  
47 make predictions for the timing of phenology events based on forecasted weather  
48 conditions. The deployment of seasonal climate forecasts (Weisheimer and Palmer  
49 2014), those beyond just a few weeks, provides the potential to forecast phenology  
50 months in advance. This time horizon is long enough to allow meaningful planning and  
51 action in response to these forecasts. With well established models, widely available  
52 data, and numerous use cases, plant phenology is well suited to serve as an exemplar for  
53 near-term ecological forecasting.

54 For decision making purposes, the most informative plant phenology forecasts will  
55 predict the response of large numbers of species and phenophases, over large spatial

56 extents, and at fine spatial resolutions. The only regularly updated phenology forecast in  
57 current operation predicts only a single aggregated “spring index” that identifies when  
58 early-spring phenological events occur at the level of the entire ecosystem (not  
59 individual species) at a resolution of 1° lat/lon grid cells (Schwartz et al. 2013, Carrillo  
60 et al. 2018). Forecasting individual species and multiple phenological events at higher  
61 resolutions is challenging due to the advanced computational tools needed for building  
62 and maintaining data-intensive automatic forecasting systems (White et al. 2018, Welch  
63 et al. 2019). Automated forecasts requires building systems that acquire data, make  
64 model-based predictions for the future, and disseminate the forecasts to end-users, all in  
65 an automated pipeline (Dietze et al. 2018, White et al. 2018, Welch et al. 2019). This is  
66 challenging even for relatively small-scale single site projects with one to several  
67 species or response variables due to the need for advanced computational tools to  
68 support robust automation (White et al. 2018, Welch et al. 2019). Building an  
69 automated system to forecast phenology for numerous species at continental scales is  
70 even more challenging due to the large-scale data intensive nature of the analyses.  
71 Specifically, because phenology is sensitive to local climate conditions, phenology  
72 modeling and prediction should be done at high resolutions (Cook et al. 2010). This  
73 requires repeatedly conducting computationally intensive downscaling of seasonal  
74 climate forecasts and making large numbers of predictions. To make 4 km resolution  
75 spatially explicit forecasts for the 78 species in our study at continental scales requires  
76 over 90 million predictions for each updated forecast. To make the forecasts actionable  
77 these computational intensive steps need to be repeated in near real-time and  
78 disseminated in a way that allows end-users to understand the forecasts and their  
79 uncertainties (Dietze et al. 2018).

80 Here we describe an automated near-term phenology forecast system we developed to  
81 make continental scale forecasts for 78 different plant species. Starting December 1st,  
82 and updated every 4 days, this system uses the latest climate information to make

83 forecasts for multiple phenophases and presents the resulting forecasts and their  
84 uncertainty on a dynamic website, <https://phenology.naturecast.org/>. Since the majority  
85 of plants complete budburst and/or flowering by the summer solstice in mid-June, this  
86 results in lead times of up to six months. We describe the key steps in the system  
87 construction, including: 1) fitting phenology models, 2) acquiring and downscaling  
88 climate data; 3) making predictions for phenological events; 4) disseminating those  
89 predictions; and 5) automating steps 2-4 to update forecasts at a sub-weekly frequency.  
90 We follow Welch et al. (2019)'s framework for describing operationalized dynamic  
91 management tools (ie. self-contained tools running automatically and regularly) and  
92 describe the major design decisions and lessons learned from implementing this system  
93 that will guide improvements to automated ecological forecasting systems. Due to the  
94 data-intensive nature of forecasting phenology at fine resolutions over large scales this  
95 system serves as a model for large-scale forecasting systems in ecology more broadly.

## 96 **Forecasting Pipeline**

97 Welch et al. (2019) break down the process of developing tools for automated prediction  
98 into four stages: 1) Acquisition, obtaining and processing the regularly updated data  
99 needed for prediction; 2) Prediction, combining the data with models to estimate the  
100 outcome of interest; 3) Dissemination, the public presentation of the predictions; and 4)  
101 Automation, the tools and approaches used to automatically update the predictions  
102 using the newest data on a regular basis. We start by describing our approach to  
103 modeling phenology and then describe our approach to each of these stages.

## 104 **Phenology Modeling**

105 Making large spatial scale phenology forecasts for a specific species requires species  
106 level observation data from as much of its respective range as possible (Taylor et al.

107 2019). We used data from the USA National Phenology Network (USA-NPN), which  
108 collects volunteer based data on phenological events and has amassed over 10 million  
109 observations representing over 1000 species. The USA-NPN protocol uses status-based  
110 monitoring, where observers answer ‘yes,’ ‘no,’ or ‘unsure’ when asked if an individual  
111 plant has a specific phenophase present (Denny et al. 2014). Phenophases refer to  
112 specific phases in the annual cycle of a plant, such as the presence of emerging leaves,  
113 flowers, fruit, or senescing leaves. We used the “Individual Phenometrics” data product,  
114 which provides pre-processed onset dates of individually monitored plants, for the  
115 phenophases budburst, flowering, and fall colors for all species with data between 2009  
116 and 2017 (USA National Phenology Network 2018). We only kept “yes” observations  
117 where the individual plant also had a “no” observation within the prior 30 days and  
118 dropped any records where a single plant had conflicting records for phenotype status or  
119 more than one series of “yes” observations for a phenophase in a 12 month period. We  
120 built models for species and phenophase combinations with at least 30 observations  
121 (Figure 1, B) using daily mean temperature data at the location and time of each  
122 observation from the PRISM 4km dataset (PRISM Climate Group 2004). We also  
123 included contributed models of budburst, flowering, and/or fruiting for 5 species which  
124 were not well represented in the USA-NPN dataset (see Appendix S1: Table S2; Janet S.  
125 Prevéy, unpublished data, 2018, Prevéy et al. (In revision); Biederman et al. (2018)).

126 For each species and phenophase we fit an ensemble of four models using daily mean  
127 temperature as the sole driver (Figure 1, C). The general model form assumes a  
128 phenological event will occur once sufficient thermal forcing units accumulate from a  
129 specified start day (Chuine et al. 2013, Chuine and Régnière 2017). The specification of  
130 forcing units are model specific, but all are derived from the 24-hour daily mean  
131 temperature. In a basic model a forcing unit is the maximum of either 0 or the mean  
132 temperature above 0°C (ie. growing degree days). The amount of forcing units required,  
133 and the date from which they start accumulating are parameterized for each species and

134 phenophase (see Appendix S1: Table S1). Ensembles of multiple models generally  
135 improve prediction over any single model by reducing bias and variance, and in a  
136 phenology context allow more accurate predictions to be made without knowing the  
137 specific physiological processes for each species (Basler 2016, Yun et al. 2017,  
138 Dormann et al. 2018). We used a weighted ensemble of four phenology models. We  
139 derived the weights for each model within the ensemble using stacking to minimize the  
140 root mean squared error on held out test data (100 fold cross-validation) as described in  
141 Dormann et al. (2018) (see Appendix S1: Sec. S1). After determining the weights we  
142 fit the core models a final time on the full dataset. Since individual process based  
143 phenology models are not probabilistic they do not allow the estimation of uncertainty  
144 in the forecasts. Therefore, we used the variance across the five climate models to  
145 represent uncertainty (see Prediction). Finally, we also fit a spatially corrected Long  
146 Term Average model for use in calculating anomalies (see Dissemination). This uses the  
147 past observations in a linear model with latitude as the sole predictor (see Appendix S1:  
148 Table S1).

149 In our pipeline 190 unique phenological models (one for each species and phenophase  
150 combination, see see Appendix S1: Table S2) needed to be individually parameterized,  
151 evaluated, and stored for future use. To consolidate all these requirements we built a  
152 dedicated software package written in Python, pyPhenology, to build, save, and load  
153 models, and also apply them to gridded climate datasets (Taylor 2018). The package  
154 also integrates the phenological model ensemble so that the four sub-models can be  
155 treated seamlessly as one in the pipeline. After parameterizing each model, its  
156 specifications are saved in a text based JSON file that is stored in a git repository along  
157 with a metadata file describing all models (Figure 1, D). This approach allows for the  
158 tracking and usage of hundreds of models, allowing models to be easily synchronized  
159 across systems, and tracking versions of models as they are updated (or even deleted).

## 160 **Acquisition and Downscaling of Climate Data**

161 Since our phenology models are based on accumulated temperature forcing, making  
162 forecasts requires information on both observed temperatures (from Nov. 30 of the prior  
163 year up to the date a forecast is made) and forecast temperatures (from the forecast date  
164 onward). For observed data we used 4km 24-hour daily mean temperature from PRISM,  
165 a gridded climate dataset for the continental U.S.A. which interpolates on the ground  
166 measurements and is updated daily (PRISM Climate Group 2004). These observed data  
167 are saved in a netCDF file, which is appended with the most recent data every time the  
168 automated forecast is run. For climate forecasts we used the Climate Forecast System  
169 Version 2 (CFSv2; a coupled atmosphere-ocean-land global circulation model) 2-m  
170 temperature data, which has a 6-hour timestep and a spatial resolution of 0.25 degrees  
171 latitude/longitude (Saha et al. 2014). CFSv2 forecasts are projected out 9 months from  
172 the issue date and are updated every 6 hours. The five most recent climate forecasts are  
173 downloaded for each updated phenology forecast to accommodate uncertainty (see  
174 Prediction).

175 Because the gridded climate forecasts are issued at large spatial resolutions (0.25  
176 degrees), this data requires downscaling to be used at ecologically relevant scales (Cook  
177 et al. 2010). A downscaling model relates observed values at the smaller scale to the  
178 larger scale values generated by the climate forecast during a past time period. We  
179 regressed these past conditions from a climate reanalysis of CFSv2 from 1995-2015  
180 (Saha et al. 2010) against the 4km daily mean temperature from the PRISM dataset for  
181 the same time period (PRISM Climate Group 2004) to build a downscaling model using  
182 asynchronous regression (Figure 1, E-G). The CFSv2 data is first interpolated from the  
183 original 0.25 degree grid to a 4km grid using distance weighted sampling, then an  
184 asynchronous regression model is applied to each 4km pixel and calendar month  
185 (Stoner et al. 2013, see Appendix S1: Sec. S2). The two parameters from the  
186 regression model for each 4 km cell are saved in a netCFD file by location and calendar



187 month (Figure 1, H). This downscaling model, at the scale of the continental U.S.A., is  
188 used to downscale the most recent CFSv2 forecasts to a 4km resolution during the  
189 automated steps.

190 We used specialized Python packages to overcome the computational challenges  
191 inherent in the large CFSv2 climate dataset (Python Software Foundation 2003). The  
192 climate forecast data for each phenology forecast update is 10-40 gigabytes, depending  
193 on the time of year (time series are longer later in the year). While it is possible to  
194 obtain hardware capable of loading this dataset into memory, a more efficient approach  
195 is to perform the downscaling and phenology model operations iteratively by subsetting  
196 the climate dataset spatially and performing operations on one chunk at a time. We used  
197 the python package xarray (Hoyer and Hamman 2017), which allows these operations  
198 to be efficiently performed in parallel through tight integration with the dask package  
199 (Dask Development Team 2016). The combination of dask and xarray allows the  
200 analysis to be run on individual workstations, stand alone servers, and high performance  
201 computing systems, and to easily scale to more predictors and higher resolution data.

## 202 **Prediction**

203 The five most recent downscaled climate forecasts are each combined with climate  
204 observations to make a five member ensemble of daily mean temperature across the  
205 continental USA (Figure 1, L). These are used to make predictions using the phenology  
206 model for each species and phenophase (Figure 1, M). Each climate ensemble member  
207 is a 3d matrix of latitude  $\times$  longitude  $\times$  time at daily timesteps extending from Nov. 1  
208 of the prior year to 9 months past the issue date. The pyPhenology package uses this  
209 object to make predictions for every 4 km grid cell in the contiguous United States,  
210 producing a 2d matrix (latitude  $\times$  longitude) where each cell represents the predicted  
211 Julian day of the phenological event. This results in approximately half a million  
212 predictions for each run of each phenology model and 90 million predictions per run of

213 the forecasting pipeline. The output of each model is cropped to the range of the  
214 respective species (US Geological Survey 1999) and saved as a netCDF file (Figure 1,  
215 N) for use in dissemination and later evaluation.

216 An important aspect of making actionable forecasts is providing decision makers with  
217 information on the uncertainty of those predictions (Dietze et al. 2018). One major  
218 component of uncertainty that is often ignored in near-term ecological forecasting  
219 studies is the uncertainty in the forecasted drivers. We incorporate information on  
220 uncertainty in temperature, the only driver in our phenology models, using the CFSv2  
221 climate ensemble (Figure 1, I; see Acquisition). The members of the climate ensemble  
222 each produce a different temperature forecast due to differences in initial conditions  
223 (Weisheimer and Palmer 2014). For each of the five climate members we make a  
224 prediction using the phenology ensemble, and the uncertainty is estimated as the  
225 variance of these predictions (see Appendix S1: Sec. S1). This allows us to present  
226 the uncertainty associated with climate, along with a point estimate of the forecast,  
227 resulting in a range of dates over which a phenological event is likely to occur.

## 228 **Dissemination**

229 To disseminate the forecasts we built a website that displays maps of the predictions for  
230 each unique species and phenophase (<https://phenology.naturecast.org/>; Figure 1 Q;  
231 Figure 2). We used the Django web framework and custom JavaScript to allow the user  
232 to select forecasts by species, phenophase, and issue date (Figure 2D). The main map  
233 shows the best estimate for when the phenological event will occur for the selected  
234 species (Figure 2A). Actionable forecasts also require an understanding of how much  
235 uncertainty is present in the prediction (Dietze et al. 2018), because knowing the  
236 expected date of an annual event such as flowering isn't particularly useful if the  
237 confidence interval stretches over several months. Therefore we also display a map of  
238 uncertainty quantified as the 95% prediction interval, the range of days within which the

239 phenology event is expected to fall 95% of the time (Figure 2C). Finally, to provide  
240 context to the current years predictions, we also map the predicted anomaly (Figure 2B).  
241 The anomaly is the difference between the predicted date and the long term, spatially  
242 corrected average date of the phenological event (Figure 1, O; see see Appendix S1:  
243 Table S1).

## 244 **Automation**

245 All of the steps in this pipeline, other than phenology and downscaling model fitting, are  
246 automatically run every 4 days. To do this we use a cron job running on a local server.  
247 Cron jobs automatically rerun code on set intervals. The cron job initiates a python  
248 script which runs the major steps in the pipeline. First the latest CFSv2 climate  
249 forecasts are acquired, downscaled, and combined with the latest PRISM climate  
250 observations (Figure 1, I-L). This data is then combined with the phenology models  
251 using the pyPhenology package to make predictions for the timing of phenological  
252 events (Figure 1, M-N). These forecasts are then converted into maps and uploaded to  
253 the website (Figure 1, O-Q). To ensure that forecasts continue to run even when  
254 unexpected events occur it is necessary to develop pipelines that are robust to  
255 unexpected errors and missing data, and are also informative when failures inevitably  
256 do happen (Welch et al. 2019). We used status checks and logging to identify and fix  
257 problems and separated the website infrastructure from the rest of the pipeline. Data are  
258 checked during acquisition to determine if there are data problems and when possible  
259 alternate data is used to replace data with issues. For example, members of the CFSv2  
260 ensemble sometimes have insufficient time series lengths. When this is the case that  
261 forecast is discarded and a preceding climate forecast obtained. With this setup  
262 occasional errors in upstream data can be ignored, and larger problems identified and  
263 corrected with minimal downtime. To prevent larger problems from preventing access  
264 to the most recent successful forecasts the website is only updated if all other steps run

265 successfully. This ensures that user of the website can always access the latest forecasts.  
266 Software packages used throughout the system include, for the R language, ggplot2  
267 (Wickham 2016), raster (Hijmans 2017), prism (Hart and Bell 2015), sp (Pebesma and  
268 Bivand 2005), tidyr (Wickham and Henry 2018), lubridate (Grolemund and Wickham  
269 2011), and ncdf4 (Pierce 2017). From the python language we also utilized xarray  
270 (Hoyer and Hamman 2017), dask, (Dask Development Team 2016), scipy (Jones et al.  
271 2001), numpy (Oliphant 2006), pandas (McKinney 2010), and mpi4py (Dalcin et al.  
272 2011). All code described is available on a GitHub repository  
273 ([https://github.com/sdtaylor/phenology\\_forecasts](https://github.com/sdtaylor/phenology_forecasts)). The code as well as 2019 forecasts  
274 and observations (see Evaluation) are also permanently archived on Zenodo  
275 (<https://doi.org/10.5281/zenodo.2577452>).

## 276 **Evaluation**

277 A primary advantage of near-term forecasts is the ability to rapidly evaluate forecast  
278 proficiency, thereby shortening the model development cycle (Dietze et al. 2018).  
279 Phenological events happen throughout the growing season, providing a consistent  
280 stream of new observations to assess. We evaluated our forecasts (made from Dec. 1,  
281 2018 thru May 1, 2019) using observations from the USA-NPN from Jan. 1, 2019  
282 through May 8, 2019 and subset to species and phenophases represented in our system  
283 (Figure 3; USA National Phenology Network (2019)). This resulted in 1581  
284 phenological events that our system had forecasts for (588 flowering events, 991  
285 budburst events, and 2 fall coloring across 65 species, see Appendix S1: Table S3).  
286 For each forecast issue date we calculated the root mean square error (RMSE) and  
287 average forecast uncertainty for all events and all prior issue dates. We also assessed the  
288 distribution of absolute errors ( $\widehat{DOY} - DOY$ ) for a subset of issue dates  
289 (approximately two a month).

290 Forecast RMSE and uncertainty both decreased for forecasts with shorter lead time  
291 (i.e. closer to the date the phenological event occurred), also known as the forecast  
292 horizon (Fig. 4; Petchey et al. (2015)). Forecasts issued at the start of the year (on Jan.  
293 5, 2019) had a RMSE of 20.9 days, while the most recent forecasts (on May 5, 2019)  
294 had an RMSE of only 18.8 days. The average uncertainty for the forecasts were 7.6 and  
295 0.2 days respectively for Jan. 5, and May 5. Errors were normally distributed with a  
296 small over-prediction bias (MAE values of 6.8 - 12.1, Fig. 5). This bias also decreased  
297 as spring progressed. These results indicate a generally well performing model, but also  
298 one with significant room for improvement that will be facilitated by the iterative nature  
299 of the forecasting system.

## 300 **Discussion**

301 We created an automated plant phenology forecasting system that makes forecasts for  
302 78 species and 4 different phenophases across the entire contiguous United States.  
303 Forecasts are updated every four days with the most recent climate observations and  
304 forecasts, converted to static maps, and uploaded to a website for dissemination. We  
305 used only open source software and data formats, and free publicly available data.  
306 While a more comprehensive evaluation of forecast performance is outside the scope of  
307 this paper, we note that the majority of forecasts provide realistic phenology estimates  
308 across known latitudinal and elevational gradients (Figure 2), and forecast uncertainty  
309 and error decreases as spring progresses (Figure 4). While there is a bias from  
310 over-estimating phenological events, estimates were on-average within 2-3 weeks of the  
311 true dates throughout the spring season.

312 Developing automated forecasting systems in ecology is important both for providing  
313 decision makers with near real-time predictions and for improving our understanding of  
314 biological systems by allowing repeated tests of, and improvements to, ecological  
315 models (Dietze et al. 2018, White et al. 2018, Welch et al. 2019). To facilitate the

316 development of ecological forecasts, we need both active development, descriptions,  
317 and discussion of a variety of forecasting systems. These discussions of the tools,  
318 philosophies, and challenges involved in forecast pipeline development will advance our  
319 understanding of how to most effectively build the systems, thereby lowering the entry  
320 barrier of operationalizing ecological models for decision making. Active development  
321 and discussion will also help us identify generalizable problems which can be solved  
322 with standardized methods, data formats, and software packages. Tools such as this can  
323 be used to more efficiently implement new ecological forecast systems, and facilitate  
324 synthetic analyses and comparisons across a variety of forecasts.

325 Automated forecasting systems typically involve multiple major steps in a combined  
326 pipeline. We found that breaking the pipeline into modular chunks made maintaining  
327 this large number of components more manageable (White et al. 2018, Welch et al.  
328 2019). For generalizable pieces of the pipeline we found that turning them into software  
329 packages eased maintenance by decoupling dependencies and allowing independent  
330 testing. Packaging large components also makes it easier for others to use code  
331 developed for a forecasting system. The phenology modelling package, pyPhenology,  
332 was developed for the current system, but is generalized for use in any phenological  
333 modelling study (Taylor 2018). We also found it useful to use different languages for  
334 different pieces of the pipeline. Our pipeline involved tasks ranging from automatically  
335 processing gigabytes of climate data to visualizing results to disseminating those results  
336 through a dynamic website. In such a pipeline no single language will fit all  
337 requirements, thus we made use of the strengths of two languages (Python and R) and  
338 their associate package ecosystems. Interoperability is facilitated by common data  
339 formats (csv and netCDF files), allowing scripts written in one language to  
340 communicate results to the next step in the pipeline written in another language.

341 This phenology forecasting system currently involves 190 different ensemble models,  
342 one for each species and phenological stage, each composed of 4 different phenology

343 sub-models and their associated weights for a total of 760 different models. This  
344 necessitates having a system for storing and documenting models, and subsequently  
345 updating them with new data and/or methods over time. We stored the fitted models in  
346 JSON files (a open-standard text format). We used the version control system git to  
347 track changes to these text based model specifications. While git was originally  
348 designed tracking changes to code, it can also be leveraged for tracking data of many  
349 forms, including our model specifications (Ram 2013, Bryan 2018, Yenni et al. 2019).  
350 Managing many different models, including different versions of those models and their  
351 associate provenance, will likely be a common challenge for ecological forecasting  
352 (White et al. 2018) as one of the goals is iteratively improving the models.

353 The initial development of this system has highlighted several potential areas for  
354 improvement. First, the data-intensive nature of this forecasting system provides  
355 challenges and opportunities for disseminating results. Currently static maps show the  
356 forecast dates of phenological events across each species respective range. However this  
357 only answers one set of questions and makes it difficult for others to build on the  
358 forecasts. Additional user interface design, including interactive maps and the potential  
359 to view forecasts for a single location, would make it easier to ask other types of  
360 questions such as “Which species will be in bloom on this date in a particular location?”.  
361 User interface design is vital for successful dissemination, and tools such the python  
362 package Django used here, or the R packages Shiny and Rmarkdown provide flexible  
363 frameworks for implementation (White et al. 2018, Welch et al. 2019). In addition it  
364 would be useful to provide access to the raw data underlying each forecast. The sheer  
365 number of forecasts makes the bi-weekly forecast data relatively large, presenting some  
366 challenges for dissemination through traditional ecological archiving services like  
367 Dryad (<https://datadryad.org>) and Zenodo (<https://zenodo.org>). If stored as csv files  
368 every forecast would have generated 15 GB of data. We addressed this by storing the  
369 forecasts in compressed netCDF files, which are optimized for large-scale

370 mutli-dimensional data and in our case are 300 times smaller than the csv files (50  
371 MB/forecast).

372 In addition to areas for improvement in the forecasting system itself, its development  
373 has highlighted areas for potential improvement in phenology modeling. Other  
374 well-known phenological drivers could be incorporated into the models, such as  
375 precipitation and daylength. Precipitation forecasts are available from the CFSv2  
376 dataset, though their accuracy is considerably lower than temperature forecasts (Saha et  
377 al. 2014). Other large-scale phenological datasets, such as remotely-sensed spring  
378 greenup could be used to constrain the species level forecasts made here (Melaas et al.  
379 2016). Our system does not currently integrate observations about how phenology is  
380 progressing within a year to update the models. USA-NPN data are available in near  
381 real-time after they are submitted by volunteers, thus there is opportunity for data  
382 assimilation of phenology observations. Making new forecasts with the latest  
383 information not only on the current state of the climate, but also on the current state of  
384 the plants themselves would likely be very informative (Luo et al. 2011, Dietze 2017).  
385 For example, if a species is leafing out sooner than expected in one area it is likely that  
386 it will also leaf out sooner than expected in nearby regions. This type of data  
387 assimilation is important for making accurate forecasts in other disciplines including  
388 meteorology (Bauer et al. 2015, Carrassi et al. 2018). However, process based plant  
389 phenology models were not designed with data assimilation in mind (Chuine et al.  
390 2013). Clark et al. (2014) built a bayesian hierarchical phenology model of budburst  
391 which incorporates the discrete observations of phenology data. This could serve as a  
392 starting point for a phenology forecasting model that incorporates data assimilation and  
393 allows species with relatively few observations to borrow strength from species with a  
394 large number of observations. The model from Clark et al. (2014) also incorporates all  
395 stages of the bud development process into a continuous latent state, thus there is also  
396 potential for forecasting the current phenological state of plants, instead of just the



397 transition dates as is currently done in this forecast system.

398 Using recent advances in open source software and large-scale open data collection we  
399 have implemented an automated high resolution, continental scale, species-level  
400 phenology forecast system. Implementing a system of this scale was made possible by a  
401 new phenology data stream and new computational tools that facilitate large scale  
402 analysis with limited computing and human resources. Most recent research papers  
403 describing ecological forecast systems focus on only the modelling aspect (Chen et al.  
404 2011, Carrillo et al. 2018, Van Doren and Horton 2018), and studies outlining  
405 implementation methods and best practices are lacking (but see White et al. 2018,  
406 Welch et al. 2019). Making a forecast system operational is key to producing applied  
407 tools, and requires a significant investment in time and other resources for data logistics  
408 and pipeline development. Major challenges here included the automated processing of  
409 large meteorological datasets, efficient application of hundreds of phenological models,  
410 and stable, consistently updated, and easy to understand dissemination of forecasts. By  
411 discussing how we addressed these challenges, and making our code publicly available,  
412 we hope to provide guidance for others developing ecological forecasting systems.

## 413 **Acknowledgments**

414 This research was supported by the Gordon and Betty Moore Foundation's Data-Driven  
415 Discovery Initiative through Grant GBMF4563 to E.P. White. We thank the USA  
416 National Phenology Network and the many participants who contribute to its Nature's  
417 Notebook program.

## 418 **References**

- 419 Basler, D. 2016. Evaluating phenological models for the prediction of leaf-out dates in  
420 six temperate tree species across central Europe. *Agricultural and Forest Meteorology*  
421 217:10–21.
- 422 Bauer, P., A. Thorpe, and G. Brunet. 2015. The quiet revolution of numerical weather  
423 prediction. *Nature* 525:47–55.
- 424 Biederman, L., D. Anderson, N. Sather, J. Pearson, J. Beckman, and J. Prekker. 2018.  
425 Using phenological monitoring in situ and historical records to determine environmental  
426 triggers for emergence and anthesis in the rare orchid *Platanthera praeclara* Sheviak &  
427 Bowles. *Global Ecology and Conservation* 16:e00461.
- 428 Bryan, J. 2018. Excuse me, do you have a moment to talk about version control? *The*  
429 *American Statistician* 72:20–27.
- 430 Carrassi, A., M. Bocquet, L. Bertino, and G. Evensen. 2018. Data assimilation in the  
431 geosciences: An overview of methods, issues, and perspectives. *Wiley Interdisciplinary*  
432 *Reviews: Climate Change* 9:e535.
- 433 Carrillo, C. M., T. R. Ault, and D. S. Wilks. 2018. Spring onset predictability in the  
434 north American multimodel ensemble. *Journal of Geophysical Research: Atmospheres*  
435 123:5913–5926.
- 436 Chen, Y., J. T. Randerson, D. C. Morton, R. S. DeFries, G. J. Collatz, P. S. Kasibhatla,  
437 L. Giglio, Y. Jin, and M. E. Marlier. 2011. Forecasting fire season severity in south  
438 America using sea surface temperature anomalies. *Science* 334:787–791.
- 439 Chuine, I., and J. Régnière. 2017. Process-based models of phenology for plants and  
440 animals. *Annual Review of Ecology, Evolution, and Systematics* 48:159–182.
- 441 Chuine, I., I. G. de Cortazar-Atauri, K. Kramer, and H. Hänninen. 2013. Plant  
442 development models. Pages 275–293 in M. D. Schwartz, editor. *Phenology: An*

- 443 integrative environmental science. Springer Netherlands, Dordrecht.
- 444 Clark, J. S., C. Salk, J. Melillo, and J. Mohan. 2014. Tree phenology responses to  
445 winter chilling, spring warming, at north and south range limits. *Functional Ecology*  
446 28:1344–1355.
- 447 Cook, B. I., A. Terando, and A. Steiner. 2010. Ecological forecasting under climatic  
448 data uncertainty: A case study in phenological modeling. *Environmental Research*  
449 *Letters* 5:044014.
- 450 Dalcin, L. D., R. R. Paz, P. A. Kler, and A. Cosimo. 2011. Parallel distributed  
451 computing using python. *Advances in Water Resources* 34:1124–1139.
- 452 Dask Development Team. 2016. Dask: Library for dynamic task scheduling.
- 453 Denny, E. G., K. L. Gerst, A. J. Miller-Rushing, G. L. Tierney, T. M. Crimmins, C. A. F.  
454 Enquist, P. Guertin, A. H. Rosemartin, M. D. Schwartz, K. A. Thomas, and J. F. Weltzin.  
455 2014. Standardized phenology monitoring methods to track plant and animal activity  
456 for science and resource management applications. *International Journal of*  
457 *Biometeorology* 58:591–601.
- 458 Dietze, M. C. 2017. Prediction in ecology: A first-principles framework. *Ecological*  
459 *Applications* 27:2048–2060.
- 460 Dietze, M. C., A. Fox, L. M. Beck-Johnson, J. L. Betancourt, M. B. Hooten, C. S.  
461 Jarnevich, T. H. Keitt, M. A. Kenney, C. M. Laney, L. G. Larsen, H. W. Loescher, C. K.  
462 Lunch, B. C. Pijanowski, J. T. Randerson, E. K. Read, A. T. Tredennick, R. Vargas, K.  
463 C. Weathers, and E. P. White. 2018. Iterative near-term ecological forecasting: Needs,  
464 opportunities, and challenges. *Proceedings of the National Academy of Sciences*  
465 115:1424–1432.
- 466 Dormann, C. F., J. M. Calabrese, G. Guillera-Arroita, E. Matechou, V. Bahn, K. Bartoń,  
467 C. M. Beale, S. Ciuti, J. Elith, K. Gerstner, J. Guelat, P. Keil, J. J. Lahoz-Monfort, L. J.

- 468 Pollock, B. Reineking, D. R. Roberts, B. Schröder, W. Thuiller, D. I. Warton, B. A.  
469 Wintle, S. N. Wood, R. O. Wüest, and F. Hartig. 2018. Model averaging in ecology: A  
470 review of bayesian, information-theoretic, and tactical approaches for predictive  
471 inference. *Ecological Monographs* 0:1–20.
- 472 Grolemund, G., and H. Wickham. 2011. Dates and times made easy with {lubridate}.  
473 *Journal of Statistical Software* 40:1–25.
- 474 Hart, E. M., and K. Bell. 2015. Prism: Download data from the oregon prism project.  
475 <http://github.com/ropensci/prism>.
- 476 Hijmans, R. J. 2017. Raster: Geographic data analysis and modeling. r package version  
477 2.6-7. <https://CRAN.R-project.org/package=raster>.
- 478 Hoyer, S., and J. J. Hamman. 2017. Xarray: N-d labeled arrays and datasets in python.  
479 *Journal of Open Research Software* 5.
- 480 Jones, E., T. Oliphant, P. Peterson, and Others. 2001. SciPy: Open source scientific  
481 tools for python. <http://www.scipy.org>.
- 482 Luo, Y., K. Ogle, C. Tucker, S. Fei, C. Gao, S. LaDeau, J. S. Clark, and D. S. Schimel.  
483 2011. Ecological forecasting and data assimilation in a data-rich era. *Ecological*  
484 *Applications* 21:1429–1442.
- 485 McKinney, W. 2010. Data structures for statistical computing in python. Pages 51–56 *in*  
486 *Proceedings of the 9th python in science conference*. SciPy, Austin, Texas, USA.
- 487 Melaas, E. K., M. A. Friedl, and A. D. Richardson. 2016. Multiscale modeling of  
488 spring phenology across Deciduous Forests in the Eastern United States. *Global Change*  
489 *Biology* 22:792–805.
- 490 Ogilvie, J. E., S. R. Griffin, Z. J. Gezon, B. D. Inouye, N. Underwood, D. W. Inouye,  
491 and R. E. Irwin. 2017. Interannual bumble bee abundance is driven by indirect climate

- 492 effects on floral resource phenology. *Ecology Letters* 20:1507–1515.
- 493 Oliphant, T. 2006. *A guide to numpy*. USA: Trelgol Publishing; Trelgol Publishing,  
494 Provo, UT.
- 495 Pebesma, E. J., and R. S. Bivand. 2005. Classes and methods for spatial data in {R}. *R*  
496 *News* 5:9–13.
- 497 Petchey, O. L., M. Pontarp, T. M. Massie, S. Kéfi, A. Ozgul, M. Weilenmann, G. M.  
498 Palamara, F. Altermatt, B. Matthews, J. M. Levine, D. Z. Childs, B. J. McGill, M. E.  
499 Schaepman, B. Schmid, P. Spaak, A. P. Beckerman, F. Pennekamp, and I. S. Pearse.  
500 2015. The ecological forecast horizon, and examples of its uses and determinants.  
501 *Ecology Letters* 18:597–611.
- 502 Pierce, D. 2017. Ncdf4: Interface to unidata netCDF (version 4 or earlier) format data  
503 files}.
- 504 Prevéy, J., L. Parker, C. Harrington, C. Lamb, and M. Proctor. In revision. Climate  
505 change shifts the habitat suitability and phenology of black huckleberry. *Agricultural*  
506 *and Forest Meteorology*.
- 507 PRISM Climate Group. 2004. Oregon state university. <http://prism.oregonstate.edu>;  
508 Oregon State University.
- 509 Python Software Foundation. 2003. Python language reference manual, version 3.6.  
510 <http://www.python.org>.
- 511 Ram, K. 2013. Git can facilitate greater reproducibility and increased transparency in  
512 science. *Source Code for Biology and Medicine* 8:7.
- 513 Richardson, A. D., R. S. Anderson, M. A. Arain, A. G. Barr, G. Bohrer, G. Chen, J. M.  
514 Chen, P. Ciais, K. J. Davis, A. R. Desai, M. C. Dietze, D. Dragoni, S. R. Garrity, C. M.  
515 Gough, R. Grant, D. Y. Hollinger, H. A. Margolis, H. McCaughey, M. Migliavacca, R.  
516 K. Monson, J. W. Munger, B. Poulter, B. M. Raczka, D. M. Ricciuto, A. K. Sahoo, K.

- 517 Schaefer, H. Tian, R. Vargas, H. Verbeeck, J. Xiao, and Y. Xue. 2012. Terrestrial  
518 biosphere models need better representation of vegetation phenology: Results from the  
519 north american carbon program site synthesis. *Global Change Biology* 18:566–584.
- 520 Saha, S., S. Moorthi, H.-L. Pan, X. Wu, J. Wang, S. Nadiga, P. Tripp, R. Kistler, J.  
521 Woollen, D. Behringer, H. Liu, D. Stokes, R. Grumbine, G. Gayno, J. Wang, Y.-T. Hou,  
522 H.-y. Chuang, H.-M. H. Juang, J. Sela, M. Iredell, R. Treadon, D. Kleist, P. Van Delst,  
523 D. Keyser, J. Derber, M. Ek, J. Meng, H. Wei, R. Yang, S. Lord, H. van den Dool, A.  
524 Kumar, W. Wang, C. Long, M. Chelliah, Y. Xue, B. Huang, J.-K. Schemm, W.  
525 Ebisuzaki, R. Lin, P. Xie, M. Chen, S. Zhou, W. Higgins, C.-Z. Zou, Q. Liu, Y. Chen, Y.  
526 Han, L. Cucurull, R. W. Reynolds, G. Rutledge, and M. Goldberg. 2010. The ncep  
527 climate forecast system reanalysis. *Bulletin of the American Meteorological Society*  
528 91:1015–1058.
- 529 Saha, S., S. Moorthi, X. Wu, J. Wang, S. Nadiga, P. Tripp, D. Behringer, Y.-T. Hou,  
530 H.-y. Chuang, M. Iredell, M. Ek, J. Meng, R. Yang, M. P. Mendez, H. van den Dool, Q.  
531 Zhang, W. Wang, M. Chen, and E. Becker. 2014. The ncep climate forecast system  
532 version 2. *Journal of Climate* 27:2185–2208.
- 533 Schwartz, M. D., T. R. Ault, and J. L. Betancourt. 2013. Spring onset variations and  
534 trends in the continental United States: past and regional assessment using  
535 temperature-based indices. *International Journal of Climatology* 33:2917–2922.
- 536 Stoner, A. M. K., K. Hayhoe, X. Yang, and D. J. Wuebbles. 2013. An asynchronous  
537 regional regression model for statistical downscaling of daily climate variables.  
538 *International Journal of Climatology* 33:2473–2494.
- 539 Taylor, S. D. 2018. PyPhenology: A python framework for plant phenology modelling.  
540 *Journal of Open Source Software* 3:827.
- 541 Taylor, S. D., J. M. Meiners, K. Riemer, M. C. Orr, and E. P. White. 2019. Comparison  
542 of large-scale citizen science data and long-term study data for phenology modeling.

543 Ecology 100:e02568.

544 US Geological Survey. 1999. Digital representation of “Atlas of United States Trees” by  
545 Elbert L. Little, Jr. US Geological Survey, Lakewood, CO.

546 USA National Phenology Network. 2018. Plant and animal phenology data. data type:  
547 Individual phenometrics. 01/01/2008-12/31/2017 for region: 49.9375°, -66.4791667°  
548 (ur); 24.0625°, -125.0208333° (ll). USA-NPN, Tucson, Arizona, USA. Data set  
549 accessed 07/08/2018 at <http://doi.org/10.5066/F78S4N1V>.

550 USA National Phenology Network. 2019. Plant and animal phenology data. data type:  
551 Individual phenometrics. 01/01/2019-05/08/2019 for region: 49.9375°, -66.4791667°  
552 (ur); 24.0625°, -125.0208333° (ll). USA-NPN, Tucson, Arizona, USA. Data set  
553 accessed 05/09/2019 at <http://doi.org/10.5066/F78S4N1V>.

554 Van Doren, B. M., and K. G. Horton. 2018. A continental system for forecasting bird  
555 migration. *Science* 361:1115–1118.

556 Weisheimer, A., and T. N. Palmer. 2014. On the reliability of seasonal climate forecasts.  
557 *Journal of The Royal Society Interface* 11:20131162–20131162.

558 Welch, H., E. L. Hazen, S. J. Bograd, M. G. Jacox, S. Brodie, D. Robinson, K. L. Scales,  
559 L. Dewitt, and R. Lewison. 2019. Practical considerations for operationalizing dynamic  
560 management tools. *Journal of Applied Ecology* 56:459–469.

561 White, E. P., G. M. Yenni, S. D. Taylor, E. M. Christensen, E. K. Bledsoe, J. L. Simonis,  
562 and S. K. Morgan Ernest. 2018. Developing an automated iterative near-term  
563 forecasting system for an ecological study. *Methods in Ecology and Evolution*.

564 Wickham, H. 2016. *Ggplot2: Elegant graphics for data analysis*. Springer-Verlag New  
565 York.

566 Wickham, H., and L. Henry. 2018. *Tidyr: Easily tidy data with 'spread()' and 'gather()'*

567 functions.

568 Yenni, G. M., E. M. Christensen, E. K. Bledsoe, S. R. Supp, R. M. Diaz, E. P. White,  
569 and S. K. M. Ernest. 2019. Developing a modern data workflow for regularly updated  
570 data. *PLOS Biology* 17:e3000125.

571 Yun, K., J. Hsiao, M.-P. Jung, I.-T. Choi, D. M. Glenn, K.-M. Shim, and S.-H. Kim.  
572 2017. Can a multi-model ensemble improve phenology predictions for climate change  
573 studies? *Ecological Modelling* 362:54–64.



## 574 **Figure Legends**

575 Figure 1: Flowchart of initial model building and automated pipeline steps. Letters  
576 indicate the associate steps discussed in the main text.

577 Figure 2: Screenshot of the forecast presentation website  
578 (<http://phenology.naturecast.org>) showing the forecast for the leaf out of *Acer*  
579 *saccharinum* in Spring, 2019, issued on February 21, 2019. The maps represent the  
580 predicted date of leaf out (A), the anomaly compared to prior years (B), and the 95%  
581 confidence interval (C). In the upper right is the interface for selecting different species,  
582 phenophases, or forecast issue dates via drop down menus (D).

583 Figure 3: Locations of phenological events which have occurred between Jan. 1, 2019  
584 and May 5, 2019 obtained from the USA National Phenology Network (blue circles),  
585 and all sampling locations in the same dataset (red points). Four individual plants are  
586 highlighted, with numbers indicating the USA National Phenology Network database  
587 ID. The solid line indicates the predicted event date as well as the 95% confidence  
588 interval for a specified forecast issue date, and the dashed line indicates the observed  
589 event date. The x-axis corresponds to the date a forecast was issued, while the y-axis is  
590 the date flowering or budburst was predicted to occur. For example: on Jan. 1, 2019 the  
591 *P. tremuloides* plant was forecast to flower sometime between March, 29 and April, 24  
592 (solid lines). The actual flowering date was March 18 (dashed line).

593 Figure 4: The root mean square error and the average uncertainty of forecasts issued  
594 between Dec. 2, 2018 and May 5, 2019 for 1581 phenological events representing 65  
595 species.

596 Figure 5: Distribution of absolute errors (prediction - observed) for 1581 phenological  
597 events for 11 selected issue dates. Labels indicate the mean absolute error (MAE).

598 **Figures**

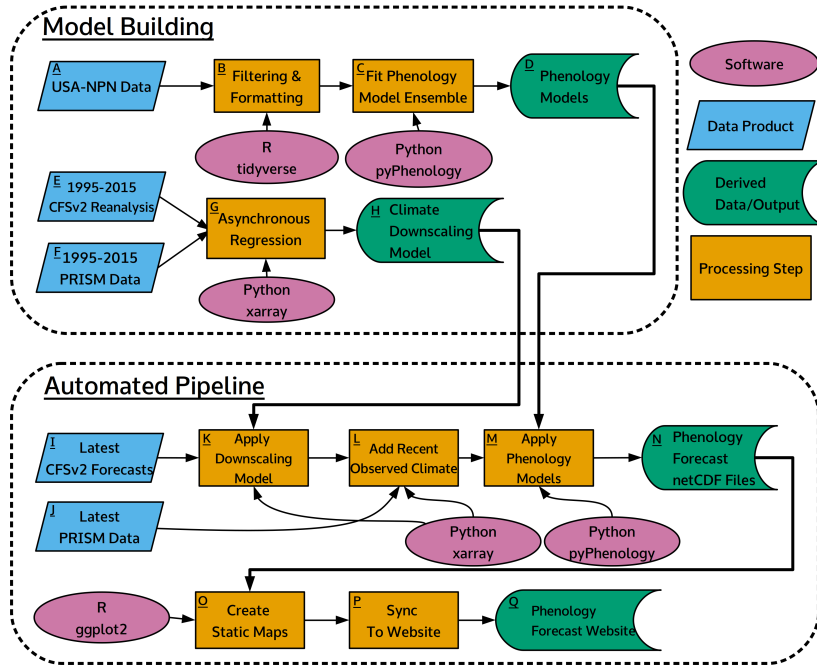

599

Figure 1

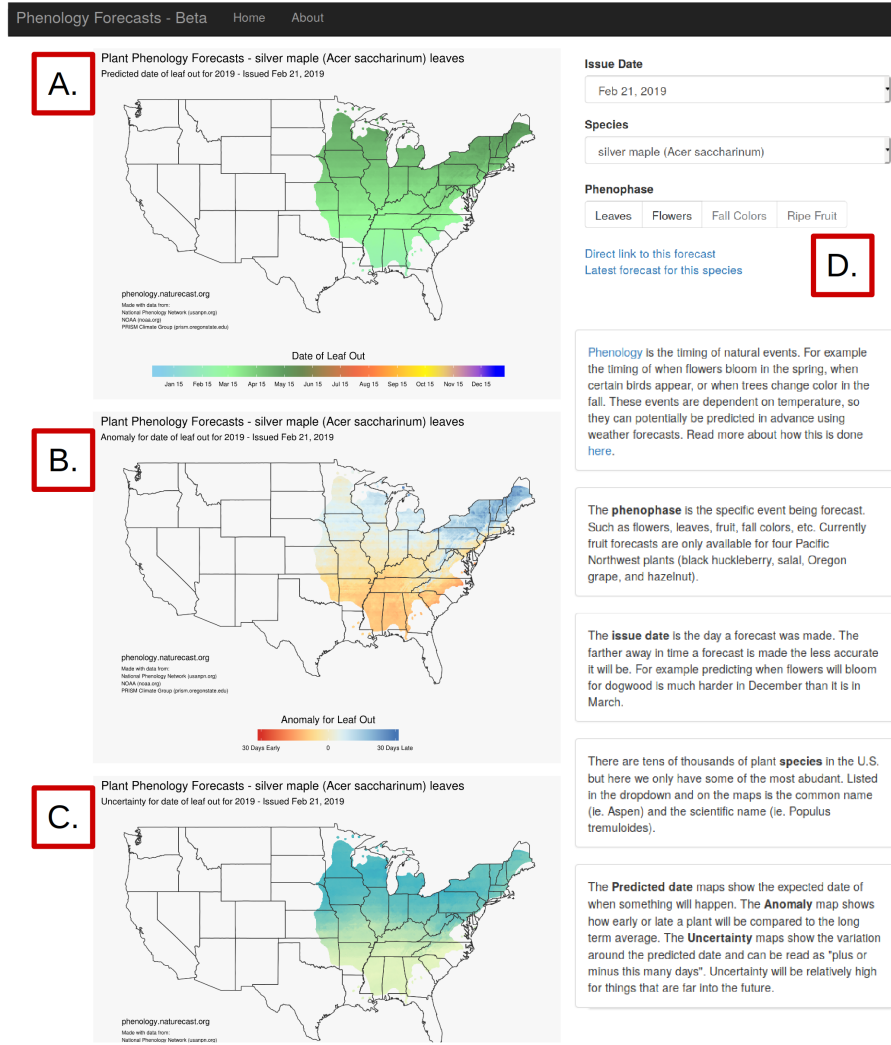

600

601 Figure 2

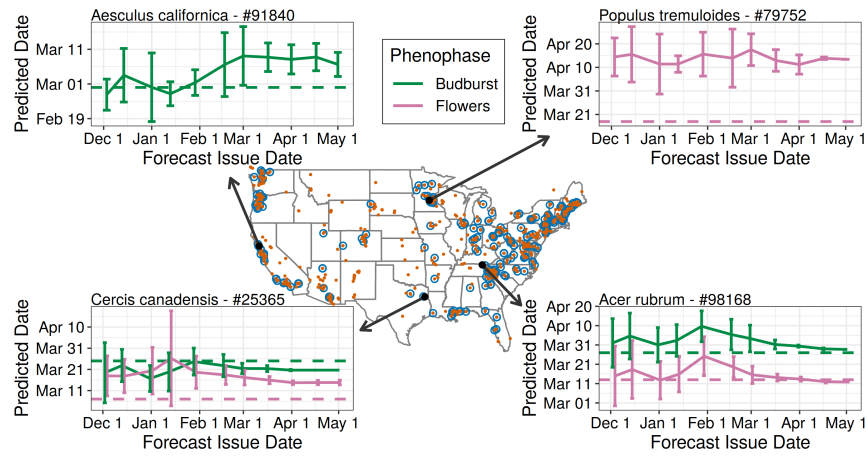

602

603 Figure 3



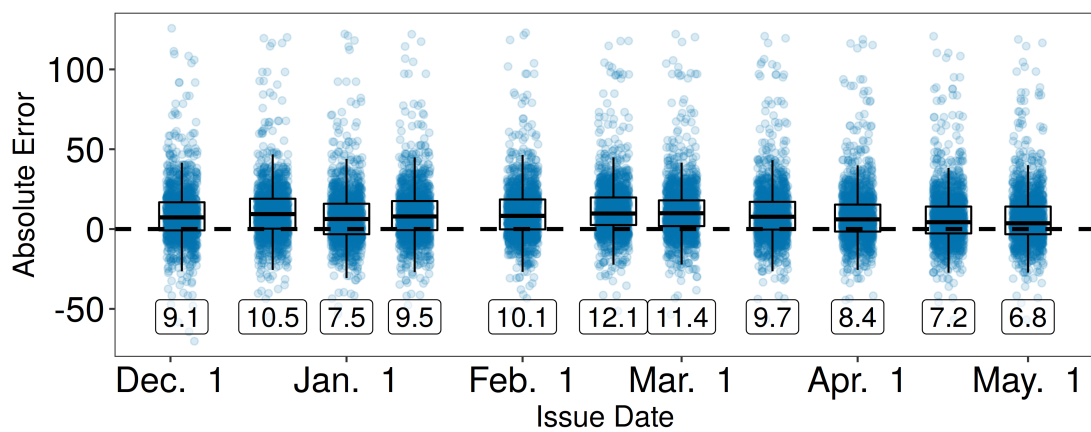

606

607 Figure 5
